# Supplementary material for: Electric-field induced half-metallic properties in an experimentally synthesized CrSBr monolayer
Source: Royal Society of Chemistry journal article supplement (doi:10.1039/d3cp04133f), 2023-01-01
Supplement: d3cp04133f1.pdf [file d3cp04133f1.pdf]

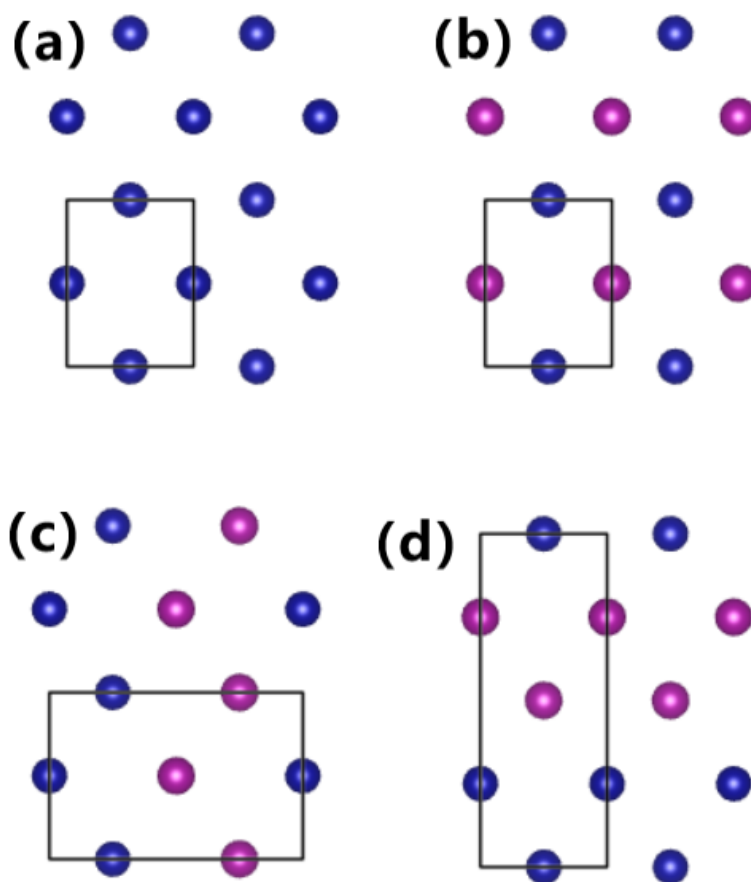

FIG. 1. (Color online) The FM (a) and three AFM configurations (AFM (b), AFM-x (c) and AFM-y (d)).

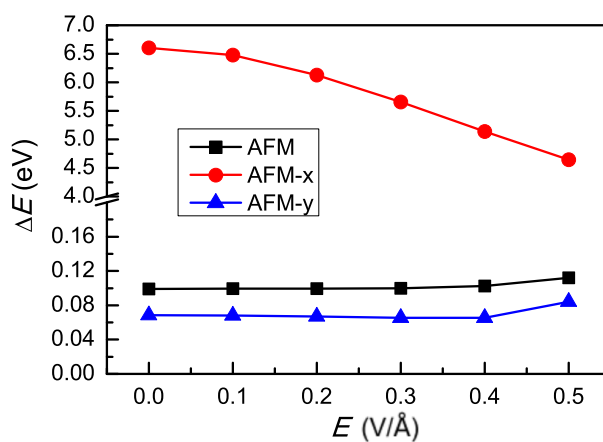

FIG. 2. (Color online) For monolayer CrSBr, the energy differences per formula unit between AFM/AFM-x/AFM-y and FM ordering as a function of electric field  $E$ .

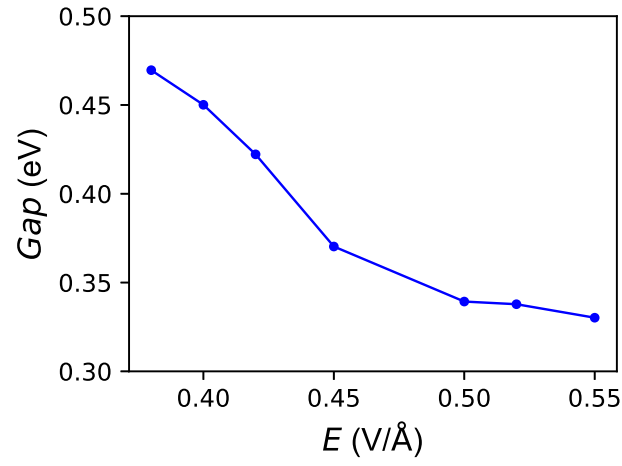

FIG. 3. (Color online) For monolayer CrSBr, the half-metallic gap as a function of electric field  $E$ .

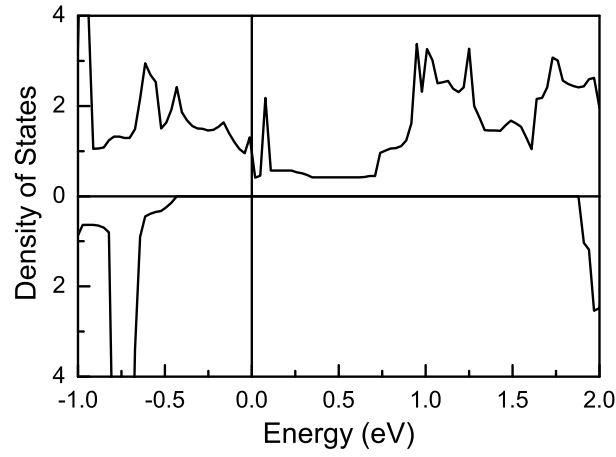

FIG. 4. (Color online) For monolayer CrSBr, the total density of states at  $E=0.42$  V/Å.

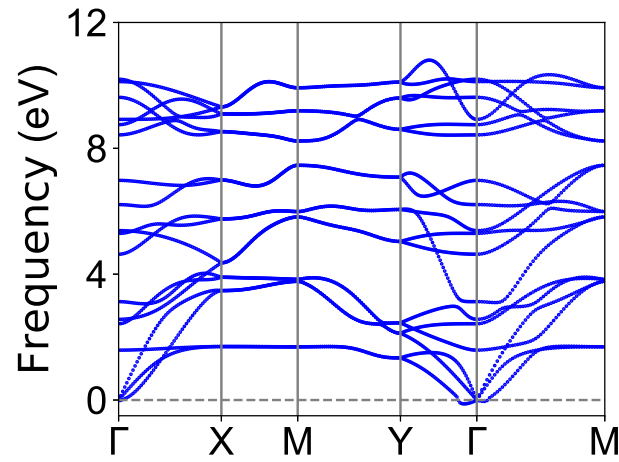

FIG. 5. (Color online) For monolayer CrSBr, the phonon dispersions at  $E=0.40$  V/Å.

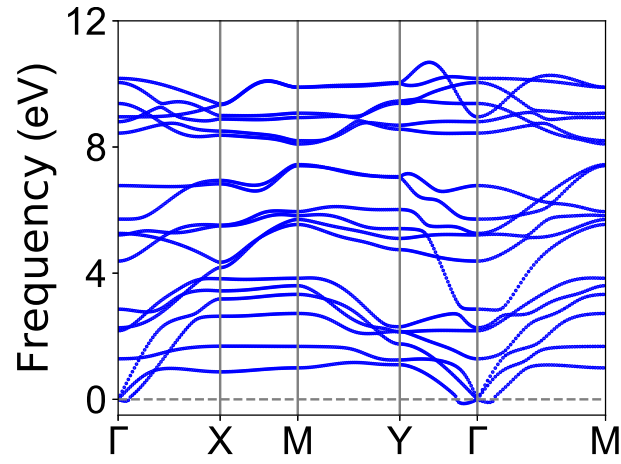

FIG. 6. (Color online) For monolayer  $\text{Cr}_2\text{S}_2\text{BrI}$ , the phonon dispersions.

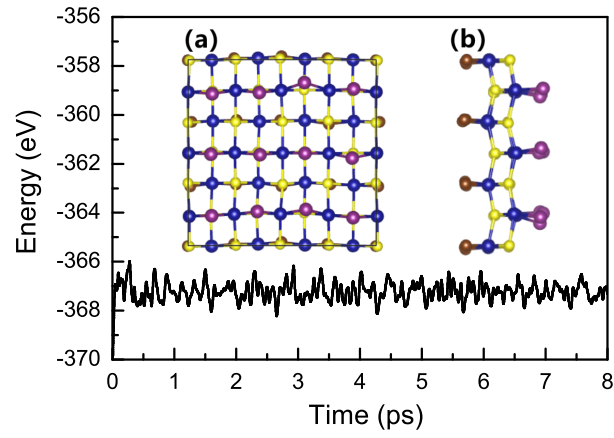

FIG. 7. (Color online) For monolayer  $\text{Cr}_2\text{S}_2\text{BrI}$ , the variation of free energy during the 8 ps AIMD simulation at 300 K. Insets show the final structures (top view (a) and side view (b)) after 8 ps at 300 K.

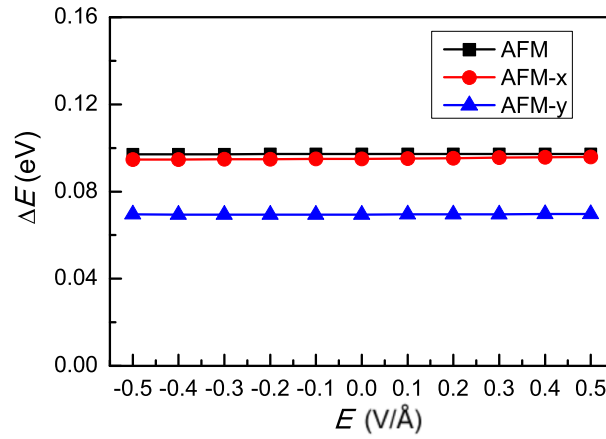

FIG. 8. (Color online) For monolayer  $\text{Cr}_2\text{S}_2\text{BrI}$ , the energy differences per formula unit between AFM/AFM-x/AFM-y and FM ordering as a function of electric field  $E$ .
